# Supplementary material for: Solar-driven dehydrogenation and dehydration of formate to syngas with near-zero CO2 emission
Source: Royal Society of Chemistry journal article supplement (doi:10.1039/d4ta08991j), 2025-01-01
Supplement: d4ta08991j1.pdf [file d4ta08991j1.pdf]

Supporting Information

# Solar-Driven Dehydrogenation and Dehydration of Formate to Syngas with Near-Zero CO<sub>2</sub> Emission

Hang Yin,<sup>a,b,‡</sup> Zehao Sun,<sup>a,‡</sup> Kaili Liu,<sup>a,‡</sup> Zhuofeng Li,<sup>c</sup> Ary Anggara Wibowo,<sup>c</sup> Jiayi Chen,<sup>a</sup>  
Huimin Gu,<sup>a</sup> Xuechen Jing,<sup>a</sup> Yi-Lun Chen,<sup>a</sup> Daniel Macdonald,<sup>c</sup> Guohua Jia,<sup>d</sup> Ido Hadar,<sup>e</sup>  
Zongyou Yin<sup>a,b,\*</sup>

<sup>a</sup> Research School of Chemistry, Australian National University, ACT 2601, Australia.

<sup>b</sup> Institute for Climate, Energy & Disaster Solutions, Australian National University, ACT 2601, Australia.

<sup>c</sup> School of Engineering, Australian National University, ACT 2601, Australia.

<sup>d</sup> School of Molecular and Life Science, Curtin University, Bentley, WA 6102 Australia.

<sup>e</sup> Institute of Chemistry, and the Center for Nanoscience and Nanotechnology, The Hebrew University of Jerusalem, Jerusalem 91904, Israel.

<sup>‡</sup> These authors contributed equally.

\* Correspondence: [zongyou.yin@anu.edu.au](mailto:zongyou.yin@anu.edu.au);

**Table S1.** Photocatalytic syngas production via photocatalysis.

| Photocatalyst                           | Photosensitizer                                                                      | Reaction condition                                                             | CO and H <sub>2</sub> production rate                                                                           | Remarks                         | Year | Ref.         |
|-----------------------------------------|--------------------------------------------------------------------------------------|--------------------------------------------------------------------------------|-----------------------------------------------------------------------------------------------------------------|---------------------------------|------|--------------|
| Co <sub>3</sub> O <sub>4</sub> -CdS-100 | N. A.                                                                                | 300W Xe lamp (AM 1.5G); 0.4M formate in NaOH aqueous solution (pH ~ 10)        | CO: 1435.5 $\mu\text{mol g}^{-1} \text{h}^{-1}$<br>H <sub>2</sub> : 1848.3 $\mu\text{mol g}^{-1} \text{h}^{-1}$ |                                 | 2024 | This work    |
| 2% Ag/TiO <sub>2</sub> -SP              | N. A.                                                                                | 150W solar simulator; MeOH aqueous solution bubbled with CO <sub>2</sub>       | CO: 103 $\mu\text{mol g}^{-1} \text{h}^{-1}$<br>H <sub>2</sub> : 220 $\mu\text{mol g}^{-1} \text{h}^{-1}$       |                                 | 2012 | <sup>1</sup> |
| Co-ZIF-9                                | [Ru(bpy) <sub>3</sub> ]Cl <sub>2</sub> ·6H <sub>2</sub> O                            | Xe lamp (>420 nm); MeCN and TEOA aqueous solution bubbled with CO <sub>2</sub> | CO: 41.8 $\mu\text{mol g}^{-1} \text{h}^{-1}$<br>H <sub>2</sub> : 29.9 $\mu\text{mol g}^{-1} \text{h}^{-1}$     | Noble metal; Sacrificial agent; | 2014 | <sup>2</sup> |
| Fe(CO) <sub>3</sub> bpy                 | [Ru(bpy) <sub>3</sub> ]Cl <sub>2</sub> ; [Ir(ppy) <sub>2</sub> (bpy)]PF <sub>6</sub> | Hg lamp (400-700 nm); NMP/TEOA aqueous solution bubbled with CO <sub>2</sub>   | CO: 35 $\mu\text{mol g}^{-1} \text{h}^{-1}$<br>H <sub>2</sub> : 42 $\mu\text{mol g}^{-1} \text{h}^{-1}$         | Noble metal; Sacrificial agent; | 2015 | <sup>3</sup> |
| Meso. TiO <sub>2</sub>                  | N. A.                                                                                | 200W UV lamp; Gas phase moisture CO <sub>2</sub>                               | CO: 5.26 $\mu\text{mol g}^{-1} \text{h}^{-1}$<br>H <sub>2</sub> : 16.7 $\mu\text{mol g}^{-1} \text{h}^{-1}$     |                                 | 2015 | <sup>4</sup> |
| TiO <sub>2</sub> fiber                  | N. A.                                                                                | Four 6W UV lamps (365 nm); CO <sub>2</sub> /H <sub>2</sub> O mix gas           | CO: 10.20 $\mu\text{mol g}^{-1} \text{h}^{-1}$<br>H <sub>2</sub> : 19.94 $\mu\text{mol g}^{-1} \text{h}^{-1}$   |                                 | 2016 | <sup>5</sup> |
| TiO <sub>2</sub> /ReP:CoP               | ( <i>E</i> )-2-Cyano-3-(50-(500-( <i>p</i> -diphenylamino)phenyl)thiophen-           | Three 60W LED lamps (>400 nm); DMF                                             | CO: 77.3 $\mu\text{mol g}^{-1} \text{h}^{-1}$<br>H <sub>2</sub> : 22.1 $\mu\text{mol g}^{-1} \text{h}^{-1}$     |                                 | 2016 | <sup>6</sup> |

|                                      |                                                           |                                                                                                                                       |                                                                                                             |                                    |      |               |
|--------------------------------------|-----------------------------------------------------------|---------------------------------------------------------------------------------------------------------------------------------------|-------------------------------------------------------------------------------------------------------------|------------------------------------|------|---------------|
|                                      | 200-yl)-thiophen-20-yl)-acrylic acid (Dye)                | aqueous solution bubbled with CO <sub>2</sub>                                                                                         |                                                                                                             |                                    |      |               |
| Rh-Au@SrTiO <sub>3</sub>             | N. A.                                                     | 300W Xe lamp (>400 nm); Gas phase CO <sub>2</sub> at 70 kPa                                                                           | CO: 66.8 μmol g <sup>-1</sup> h <sup>-1</sup><br>H <sub>2</sub> : 50.5 μmol g <sup>-1</sup> h <sup>-1</sup> |                                    | 2016 | <sup>7</sup>  |
| Co <sub>6</sub> -MOF                 | [Ru(bpy) <sub>3</sub> ]Cl <sub>2</sub> ·6H <sub>2</sub> O | 150W Xe lamp (420-780 nm); MeCN and TEOA aqueous solution bubbled with CO <sub>2</sub>                                                | CO: 39.6 μmol<br>H <sub>2</sub> : 28.13 μmol                                                                | Noble metal;<br>Sacrificial agent; | 2017 | <sup>8</sup>  |
| Co(bpy) <sub>2</sub> Cl <sub>2</sub> | [Ru(bpy) <sub>3</sub> ]Cl <sub>2</sub>                    | 300W Xe lamp (>420 nm); MeCN and TEOA aqueous solution bubbled with CO <sub>2</sub>                                                   | CO: 62.3 μmol<br>H <sub>2</sub> : 69.9 μmol                                                                 | Noble metal;<br>Sacrificial agent; | 2018 | <sup>9</sup>  |
| C-BMZIFs                             | [Ru(bpy) <sub>3</sub> ]Cl <sub>2</sub> ·6H <sub>2</sub> O | 100W LED light (420 nm); MeCN and TEOA aqueous solution bubbled with CO <sub>2</sub>                                                  | CO: 6883 μmol g <sup>-1</sup> h <sup>-1</sup><br>H <sub>2</sub> : 3600 μmol g <sup>-1</sup> h <sup>-1</sup> | Noble metal;<br>Sacrificial agent; | 2018 | <sup>10</sup> |
| MTC <sub>3.17P</sub> -MS             | N. A.                                                     | 300W Xe lamp (Solar); 0.1 M KHCO <sub>3</sub> and 0.1 M Na <sub>2</sub> SO <sub>3</sub> aqueous solution bubbled with CO <sub>2</sub> | CO: 80 μmol g <sup>-1</sup> h <sup>-1</sup><br>H <sub>2</sub> : 160 μmol g <sup>-1</sup> h <sup>-1</sup>    |                                    | 2018 | <sup>11</sup> |
| Pd/CoAl-7.57                         | [Ru(bpy) <sub>3</sub> ]Cl <sub>2</sub> ·6H <sub>2</sub> O | 300W Xe lamp (400-800 nm); MeCN and TEOA aqueous solution                                                                             | CO: 1300 μmol g <sup>-1</sup> h <sup>-1</sup><br>H <sub>2</sub> : 600 μmol g <sup>-1</sup> h <sup>-1</sup>  | Noble metal;<br>Sacrificial agent; | 2019 | <sup>12</sup> |

|                                                                                                                                    |                                                           |                                                                                     |                                                                                                                |                                 |      |               |
|------------------------------------------------------------------------------------------------------------------------------------|-----------------------------------------------------------|-------------------------------------------------------------------------------------|----------------------------------------------------------------------------------------------------------------|---------------------------------|------|---------------|
|                                                                                                                                    |                                                           | bubbled with CO <sub>2</sub> at 1.8 bar                                             |                                                                                                                |                                 |      |               |
| (Co/Ru) <sub>2.4</sub> -UiO-67(bpydc)                                                                                              | [Ru(bpy) <sub>3</sub> ]Cl <sub>2</sub> ·6H <sub>2</sub> O | 450 nm LED lamp; MeCN and TEOA aqueous solution bubbled with CO <sub>2</sub>        | CO: 282.5 μmol g <sup>-1</sup> h <sup>-1</sup><br>H <sub>2</sub> : 570.1 μmol g <sup>-1</sup> h <sup>-1</sup>  | Noble metal; Sacrificial agent; | 2019 | <sup>13</sup> |
| [Co <sub>3</sub> (SiW <sub>12</sub> O <sub>40</sub> )(H <sub>2</sub> O) <sub>3</sub> -(Htrz) <sub>6</sub> Cl]·Cl·6H <sub>2</sub> O | [Ru(bpy) <sub>3</sub> ]Cl <sub>2</sub> ·6H <sub>2</sub> O | 300W Xe lamp (>420 nm); MeCN and TEOA aqueous solution bubbled with CO <sub>2</sub> | CO: 6167 μmol g <sup>-1</sup> h <sup>-1</sup><br>H <sub>2</sub> : 6066 μmol g <sup>-1</sup> h <sup>-1</sup>    | Noble metal; Sacrificial agent; | 2019 | <sup>14</sup> |
| CoN <sub>4</sub> -SiO <sub>2</sub>                                                                                                 | g-C <sub>3</sub> N <sub>4</sub>                           | LED (450 nm); MeCN and TEA solution bubbled with CO <sub>2</sub>                    | CO: 398 μmol g <sup>-1</sup> h <sup>-1</sup><br>H <sub>2</sub> : 804 μmol g <sup>-1</sup> h <sup>-1</sup>      | Sacrificial agent;              | 2019 | <sup>15</sup> |
| Ag <sub>1.0</sub> Au <sub>1.0</sub> /TiO <sub>2</sub>                                                                              | N. A.                                                     | Four 6W UV lamps (365 nm); CO <sub>2</sub> /H <sub>2</sub> O mix gas                | CO: 0.15 μmol g <sup>-1</sup> h <sup>-1</sup><br>H <sub>2</sub> : 0.29 μmol g <sup>-1</sup> h <sup>-1</sup>    |                                 | 2020 | <sup>16</sup> |
| CdSNRs                                                                                                                             | Fe(III)-Salen                                             | 300W Xe lamp (>420 nm); 1.33 M formic acid aqueous solution;                        | CO: 71500 μmol g <sup>-1</sup> h <sup>-1</sup><br>H <sub>2</sub> : 150000 μmol g <sup>-1</sup> h <sup>-1</sup> | CO <sub>2</sub> emission;       | 2020 | <sup>17</sup> |
| [Co <sub>5</sub> (btz) <sub>6</sub> (NO <sub>3</sub> ) <sub>4</sub> (H <sub>2</sub> O) <sub>4</sub> ]                              | [Ru(bpy) <sub>3</sub> ]Cl <sub>2</sub>                    | 300W Xe lamp (>420 nm); MeCN and TEOA solution bubbled with CO <sub>2</sub>         | CO: 79.2 μmol<br>H <sub>2</sub> : 140.6 μmol                                                                   | Noble metal; Sacrificial agent; | 2020 | <sup>18</sup> |
| CoAl-LDH/MoS <sub>2</sub>                                                                                                          | [Ru(bpy) <sub>3</sub> ]Cl <sub>2</sub> ·6H <sub>2</sub> O | 300W Xe lamp (>400 nm); MeCN and TEOA aqueous solution bubbled                      | CO: 8070 μmol g <sup>-1</sup> h <sup>-1</sup><br>H <sub>2</sub> : 8415 μmol g <sup>-1</sup> h <sup>-1</sup>    | Noble metal; Sacrificial agent; | 2020 | <sup>19</sup> |

|                                                                      |                                                           |                                                                                        |                                                                                                                                         |                                    |      |               |
|----------------------------------------------------------------------|-----------------------------------------------------------|----------------------------------------------------------------------------------------|-----------------------------------------------------------------------------------------------------------------------------------------|------------------------------------|------|---------------|
|                                                                      |                                                           | with CO <sub>2</sub> at 1.8 bar                                                        |                                                                                                                                         |                                    |      |               |
| Pt modified Re-Bpy-sp <sup>2</sup> c-COF                             | N. A.                                                     | 300W Xe lamp (>420 nm); MeCN and TEOA solution bubbled with CO <sub>2</sub>            | CO: from ~1000 to ~100 μmol g <sup>-1</sup> h <sup>-1</sup><br>H <sub>2</sub> : from ~200 to ~1200 μmol g <sup>-1</sup> h <sup>-1</sup> | Noble metal;<br>Sacrificial agent; | 2020 | <sup>20</sup> |
| Fe <sub>0.5</sub> Ni <sub>0.5</sub> -COFs                            | [Ru(bpy) <sub>3</sub> ]Cl <sub>2</sub> ·6H <sub>2</sub> O | 5W white LED (400-800 nm); MeCN and TEOA aqueous solution bubbled with CO <sub>2</sub> | CO: ~1750 μmol g <sup>-1</sup> h <sup>-1</sup><br>H <sub>2</sub> : ~2500 μmol g <sup>-1</sup> h <sup>-1</sup>                           | Noble metal;<br>Sacrificial agent; | 2020 | <sup>21</sup> |
| CoO-Mo <sub>8</sub> UNWs                                             | [Ru(bpy) <sub>3</sub> ]Cl <sub>2</sub> ·6H <sub>2</sub> O | 300W Xe lamp (>400 nm); MeCN and TEOA aqueous solution bubbled with CO <sub>2</sub>    | CO: 4165 μmol g <sup>-1</sup> h <sup>-1</sup><br>H <sub>2</sub> : 11555 μmol g <sup>-1</sup> h <sup>-1</sup>                            | Noble metal;<br>Sacrificial agent; | 2020 | <sup>22</sup> |
| Co <sub>2</sub> [Co <sub>20</sub> Mo <sub>16</sub> P <sub>24</sub> ] | [Ru(bpy) <sub>3</sub> ]Cl <sub>2</sub> ·6H <sub>2</sub> O | Xe lamp; MeCN and TEOA aqueous solution bubbled with CO <sub>2</sub>                   | CO: ~16600 μmol g <sup>-1</sup> h <sup>-1</sup><br>H <sub>2</sub> : ~56000 μmol g <sup>-1</sup> h <sup>-1</sup>                         | Noble metal;<br>Sacrificial agent; | 2020 | <sup>23</sup> |
| [Co(H <sub>2</sub> O) <sub>6</sub> ][Co-POM]                         | [Ru(bpy) <sub>3</sub> ]Cl <sub>2</sub> ·6H <sub>2</sub> O | Xe lamp (>420 nm); MeCN and TEOA aqueous solution bubbled with CO <sub>2</sub>         | CO: 24000 μmol g <sup>-1</sup> h <sup>-1</sup><br>H <sub>2</sub> : 13300 μmol g <sup>-1</sup> h <sup>-1</sup>                           | Noble metal;<br>Sacrificial agent; | 2020 | <sup>24</sup> |
| Mn SAs                                                               | [Ru(bpy) <sub>3</sub> ]Cl <sub>2</sub> ·6H <sub>2</sub> O | Xe lamp (>420 nm); MeCN and TEOA aqueous solution bubbled with CO <sub>2</sub>         | CO: 1470 μmol g <sup>-1</sup> h <sup>-1</sup><br>H <sub>2</sub> : 1310 μmol g <sup>-1</sup> h <sup>-1</sup>                             | Noble metal;<br>Sacrificial agent; | 2020 | <sup>25</sup> |
| Fe-SAs/N-C                                                           | [Ru(bpy) <sub>3</sub> ]Cl <sub>2</sub> ·6H <sub>2</sub> O | 5W white                                                                               | CO: 4500                                                                                                                                | Noble                              | 2020 | <sup>26</sup> |

|                                          |                                                           |                                                                                                                                         |                                                                                                              |                                    |      |               |
|------------------------------------------|-----------------------------------------------------------|-----------------------------------------------------------------------------------------------------------------------------------------|--------------------------------------------------------------------------------------------------------------|------------------------------------|------|---------------|
|                                          |                                                           | LED (400-800 nm); MeCN and TEOA aqueous solution bubbled with CO <sub>2</sub>                                                           | μmol g <sup>-1</sup> h <sup>-1</sup><br>H <sub>2</sub> : 4950 μmol g <sup>-1</sup> h <sup>-1</sup>           | metal;<br>Sacrificial agent;       |      |               |
| Cu <sub>2</sub> O/MnO <sub>x</sub>       | N. A.                                                     | 300W Xe lamp (>420 nm); 0.1 M KHCO <sub>3</sub> and 0.1 M Na <sub>2</sub> SO <sub>3</sub> aqueous solution bubbled with CO <sub>2</sub> | CO: 114.2 μmol g <sup>-1</sup> h <sup>-1</sup><br>H <sub>2</sub> : 82.2 μmol g <sup>-1</sup> h <sup>-1</sup> |                                    | 2020 | <sup>27</sup> |
| CeO <sub>2</sub> -LDH                    | [Ru(bpy) <sub>3</sub> ]Cl <sub>2</sub> ·6H <sub>2</sub> O | 300W Xe lamp (visible light); MeCN and TEOA aqueous solution bubbled with CO <sub>2</sub> at 1.8 bar                                    | CO: 5 μmol g <sup>-1</sup> h <sup>-1</sup><br>H <sub>2</sub> : 52 μmol g <sup>-1</sup> h <sup>-1</sup>       | Noble metal;<br>Sacrificial agent; | 2021 | <sup>28</sup> |
| Fe <sub>0.5</sub> Ni <sub>0.5</sub> MOFs | [Ru(bpy) <sub>3</sub> ]Cl <sub>2</sub> ·6H <sub>2</sub> O | 5W white LED (400-1000 nm); MeCN and TEOA aqueous solution bubbled with CO <sub>2</sub>                                                 | CO: 5000 μmol g <sup>-1</sup> h <sup>-1</sup><br>H <sub>2</sub> : 5500 μmol g <sup>-1</sup> h <sup>-1</sup>  | Noble metal;<br>Sacrificial agent; | 2021 | <sup>29</sup> |
| CTF-TDPN                                 | [Co(bpy) <sub>3</sub> ] <sup>2+</sup>                     | 300W Xe lamp (>420 nm); MeCN and TEOA aqueous solution bubbled with CO <sub>2</sub>                                                     | CO: 200 μmol g <sup>-1</sup> h <sup>-1</sup><br>H <sub>2</sub> : 140 μmol g <sup>-1</sup> h <sup>-1</sup>    | Sacrificial agent;                 | 2021 | <sup>30</sup> |
| NVs-PCN                                  | Co(bpy) <sub>3</sub>                                      | 50W LED lamp (420 nm); MeCN and TEOA aqueous                                                                                            | CO: 400 μmol g <sup>-1</sup> h <sup>-1</sup><br>H <sub>2</sub> : 100 μmol g <sup>-1</sup> h <sup>-1</sup>    | Sacrificial agent;                 | 2021 | <sup>31</sup> |

|                                         |                                                           |                                                                                      |                                                                                                                |                                                  |      |               |
|-----------------------------------------|-----------------------------------------------------------|--------------------------------------------------------------------------------------|----------------------------------------------------------------------------------------------------------------|--------------------------------------------------|------|---------------|
|                                         |                                                           | solution bubbled with CO <sub>2</sub>                                                |                                                                                                                |                                                  |      |               |
| POP <sub>2</sub> -Fe                    | [Ru(bpy) <sub>3</sub> ]Cl <sub>2</sub> ·6H <sub>2</sub> O | 500W Xe lamp; DMF and TEOA solution bubbled with CO <sub>2</sub>                     | CO: 3043 μmol g <sup>-1</sup> h <sup>-1</sup><br>H <sub>2</sub> : 3753 μmol g <sup>-1</sup> h <sup>-1</sup>    | Noble metal; Sacrificial agent;                  | 2021 | <sup>32</sup> |
| Pt/BP-OvMBWO                            | N. A.                                                     | 300W Xe lamp; MeCN and TEOA aqueous solution bubbled with CO <sub>2</sub>            | CO: 20.5 μmol g <sup>-1</sup> h <sup>-1</sup><br>H <sub>2</sub> : 16.8 μmol g <sup>-1</sup> h <sup>-1</sup>    | Noble metal; Sacrificial agent;                  | 2021 | <sup>33</sup> |
| Ag/LaFeO <sub>3</sub>                   | N. A.                                                     | 300W Xe lamp; 0.5 M NaHCO <sub>3</sub> aqueous solution bubbled with CO <sub>2</sub> | CO: 2.41 μmol g <sup>-1</sup> h <sup>-1</sup><br>H <sub>2</sub> : 7.3 μmol g <sup>-1</sup> h <sup>-1</sup>     |                                                  | 2021 | <sup>34</sup> |
| CdS/EDA NW                              | N. A.                                                     | 300W Xe lamp (>420 nm); MeCN and TEOA aqueous solution bubbled with CO <sub>2</sub>  | CO: 115.6 μmol g <sup>-1</sup> h <sup>-1</sup><br>H <sub>2</sub> : 959.4 μmol g <sup>-1</sup> h <sup>-1</sup>  | Sacrificial agent;                               | 2022 | <sup>35</sup> |
| CdS/TiO <sub>2</sub> :Cu hollow spheres | N. A.                                                     | 300W Xe lamp; Gas phase CO <sub>2</sub> + H <sub>2</sub> S                           | CO: 781.3 μmol g <sup>-1</sup> h <sup>-1</sup><br>H <sub>2</sub> : 5875.1 μmol g <sup>-1</sup> h <sup>-1</sup> | Sacrificial agent; Presence of H <sub>2</sub> S; | 2022 | <sup>36</sup> |
| ReCo-NU1000                             | N. A.                                                     | Eight LED (450 nm); MeCN and BIH aqueous solution bubbled with CO <sub>2</sub>       | CO: 280 μmol g <sup>-1</sup> h <sup>-1</sup><br>H <sub>2</sub> : 114 μmol g <sup>-1</sup> h <sup>-1</sup>      | Sacrificial agent;                               | 2023 | <sup>37</sup> |
| CdS/CNT                                 | Fe porphyrin complexes                                    | 300W Xe lamp (>420 nm); 1.33 M formic acid in MeCN aqueous                           | CO: 12616 μmol g <sup>-1</sup> h <sup>-1</sup><br>H <sub>2</sub> : 20500 μmol g <sup>-1</sup> h <sup>-1</sup>  | CO <sub>2</sub> emission;                        | 2023 | <sup>38</sup> |

|                                                        |                                                           |                                                                                      |                                                                                                                              |                                 |      |               |
|--------------------------------------------------------|-----------------------------------------------------------|--------------------------------------------------------------------------------------|------------------------------------------------------------------------------------------------------------------------------|---------------------------------|------|---------------|
|                                                        |                                                           | solution                                                                             |                                                                                                                              |                                 |      |               |
| CdS/W <sub>2</sub> N <sub>3</sub>                      | N. A.                                                     | 300W Xe lamp (>420 nm); 6 M formic acid with proper NaOH aqueous solution (pH = 3.5) | CO: 103500 $\mu\text{mol g}^{-1} \text{h}^{-1}$<br>H <sub>2</sub> : 131000 $\mu\text{mol g}^{-1} \text{h}^{-1}$              | CO <sub>2</sub> emission;       | 2023 | <sup>39</sup> |
| Ni <sub>x</sub> Co <sub>1-x</sub> -GR                  | [Ru(bpy) <sub>3</sub> ]Cl <sub>2</sub> ·6H <sub>2</sub> O | 300W Xe lamp (>420 nm); MeCN and TEOA aqueous solution bubbled with CO <sub>2</sub>  | CO: 12526 to 2953 $\mu\text{mol g}^{-1} \text{h}^{-1}$<br>H <sub>2</sub> : 844 to 10027 $\mu\text{mol g}^{-1} \text{h}^{-1}$ | Noble metal; Sacrificial agent; | 2023 | <sup>40</sup> |
| Janus PdZn-Co                                          | [Ru(bpy) <sub>3</sub> ]Cl <sub>2</sub> ·6H <sub>2</sub> O | 300W Xe lamp (>420 nm); MeCN and TEOA aqueous solution bubbled with CO <sub>2</sub>  | CO: 20300 $\mu\text{mol g}^{-1} \text{h}^{-1}$<br>H <sub>2</sub> : 9900 $\mu\text{mol g}^{-1} \text{h}^{-1}$                 | Noble metal; Sacrificial agent; | 2023 | <sup>41</sup> |
| Co <sup>III</sup> -PBA@Co <sup>II</sup> -PBA           | [Ru(bpy) <sub>3</sub> ]Cl <sub>2</sub> ·6H <sub>2</sub> O | 300W Xe lamp (>420 nm); MeCN and TEOA aqueous solution bubbled with CO <sub>2</sub>  | CO: 50560 $\mu\text{mol g}^{-1} \text{h}^{-1}$<br>H <sub>2</sub> : 41630 $\mu\text{mol g}^{-1} \text{h}^{-1}$                | Noble metal; Sacrificial agent; | 2023 | <sup>42</sup> |
| CdS/V <sub>0.1</sub> W <sub>0.9</sub> N <sub>1.5</sub> | N. A.                                                     | 300W Xe lamp (AM 1.5G); 1 M formic acid solution                                     | CO: 9867.5 $\mu\text{mol g}^{-1} \text{h}^{-1}$<br>H <sub>2</sub> : 46010 $\mu\text{mol g}^{-1} \text{h}^{-1}$               | CO <sub>2</sub> emission;       | 2024 | <sup>43</sup> |



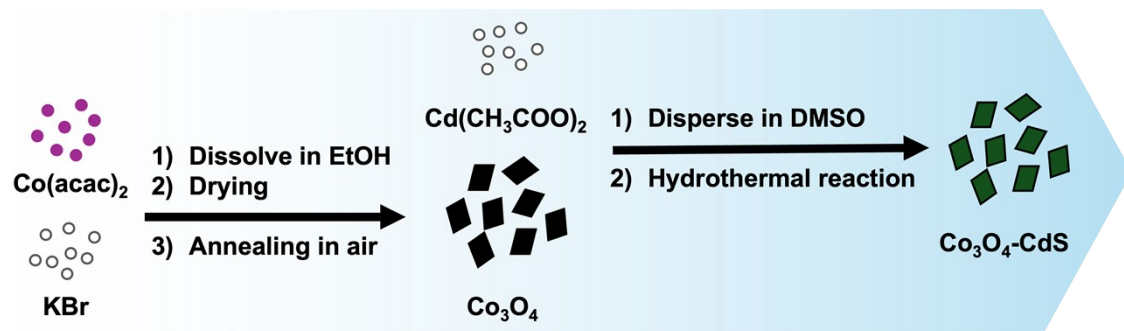

**Fig. S1** Illustration of preparation method of  $\text{Co}_3\text{O}_4\text{-CdS}$  composites.

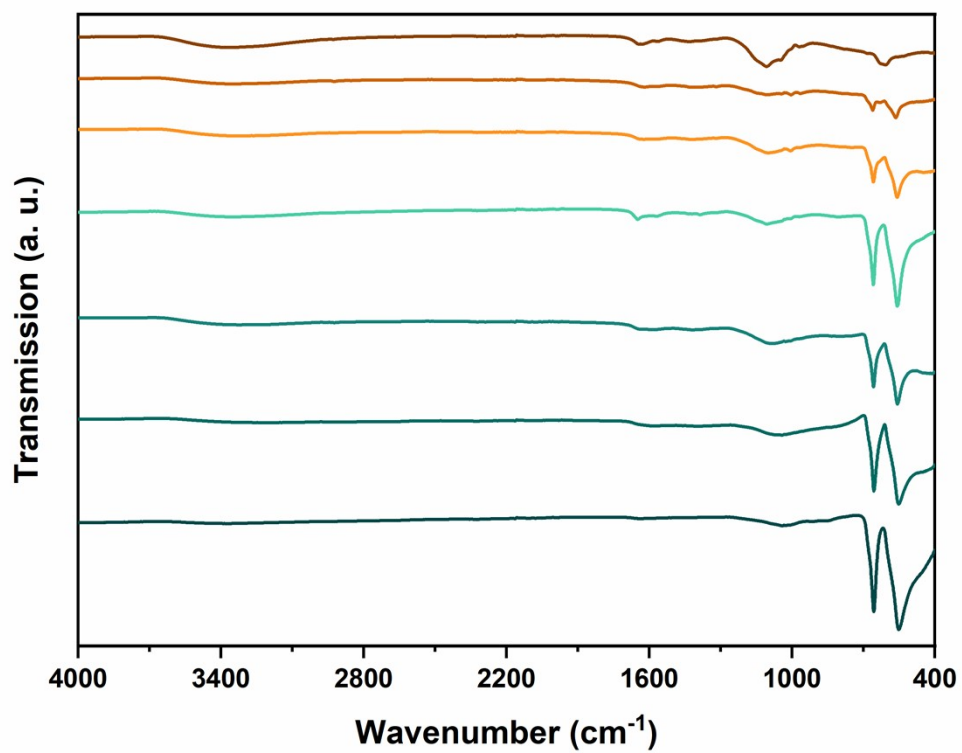

**Fig. S2** FTIR spectra of Co<sub>3</sub>O<sub>4</sub>-CdS composites, from bottom to top: Co<sub>3</sub>O<sub>4</sub>, Co<sub>3</sub>O<sub>4</sub>-S, Co<sub>3</sub>O<sub>4</sub>-CdS-40, Co<sub>3</sub>O<sub>4</sub>-CdS-80, Co<sub>3</sub>O<sub>4</sub>-100, Co<sub>3</sub>O<sub>4</sub>-200, and CdS.

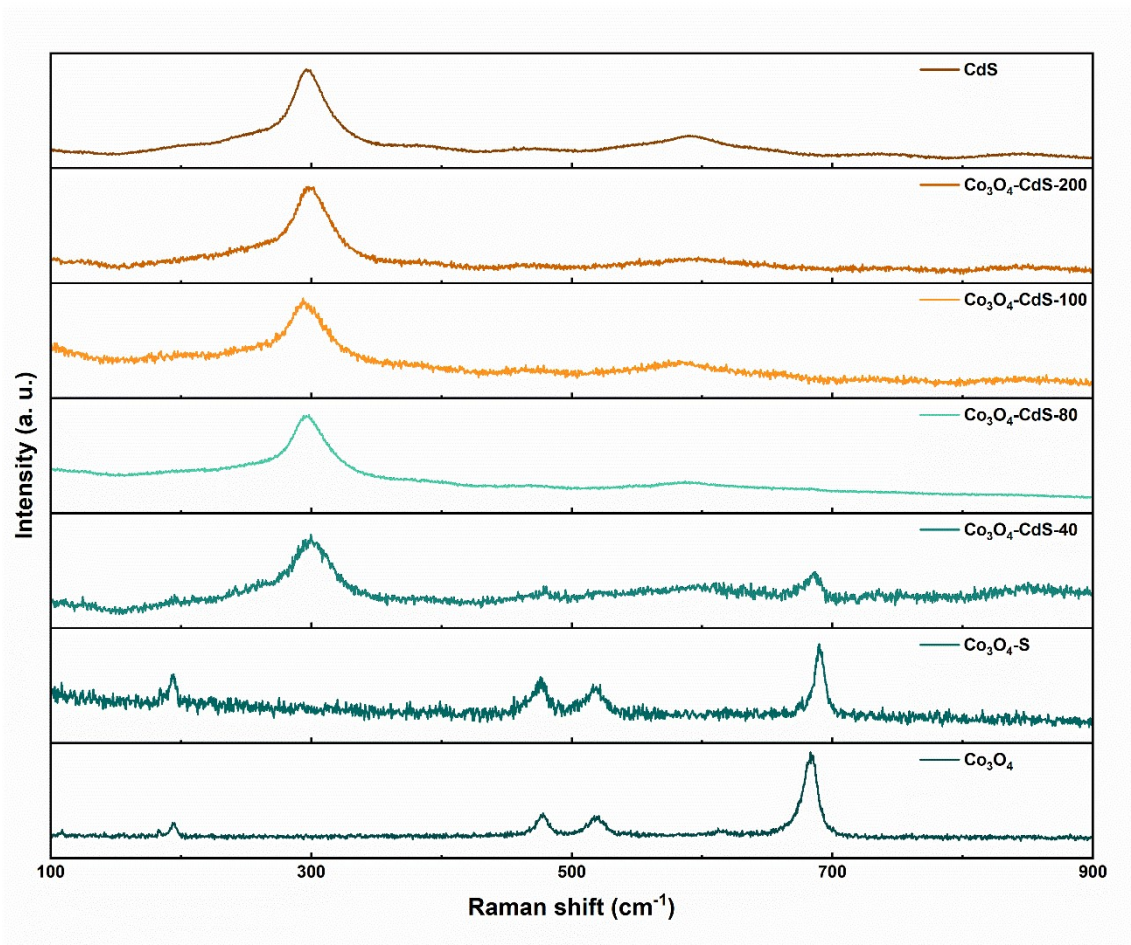

**Fig. S3** Raman spectra of Co<sub>3</sub>O<sub>4</sub>-CdS composites.

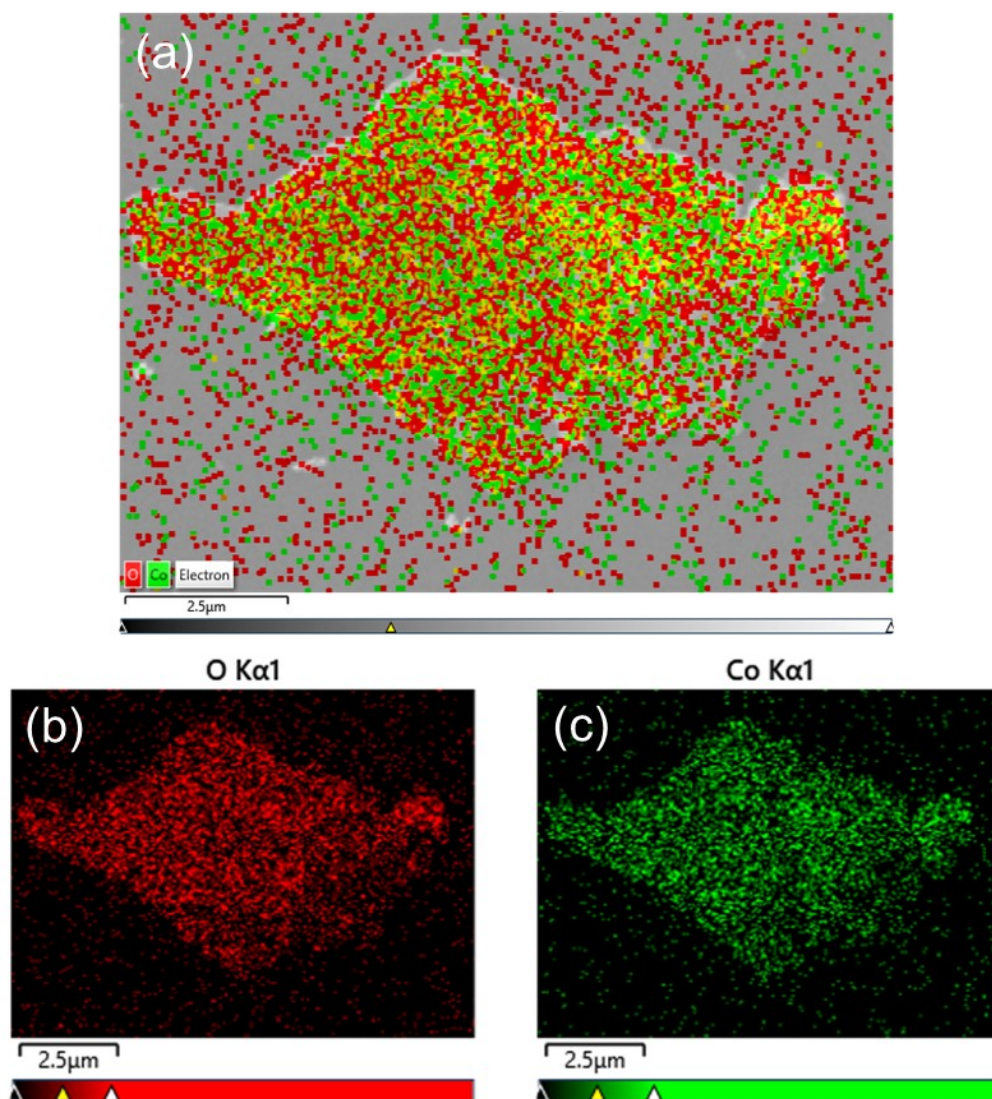

Fig. S4 (a-c) SEM elemental mapping of  $\text{Co}_3\text{O}_4$ .

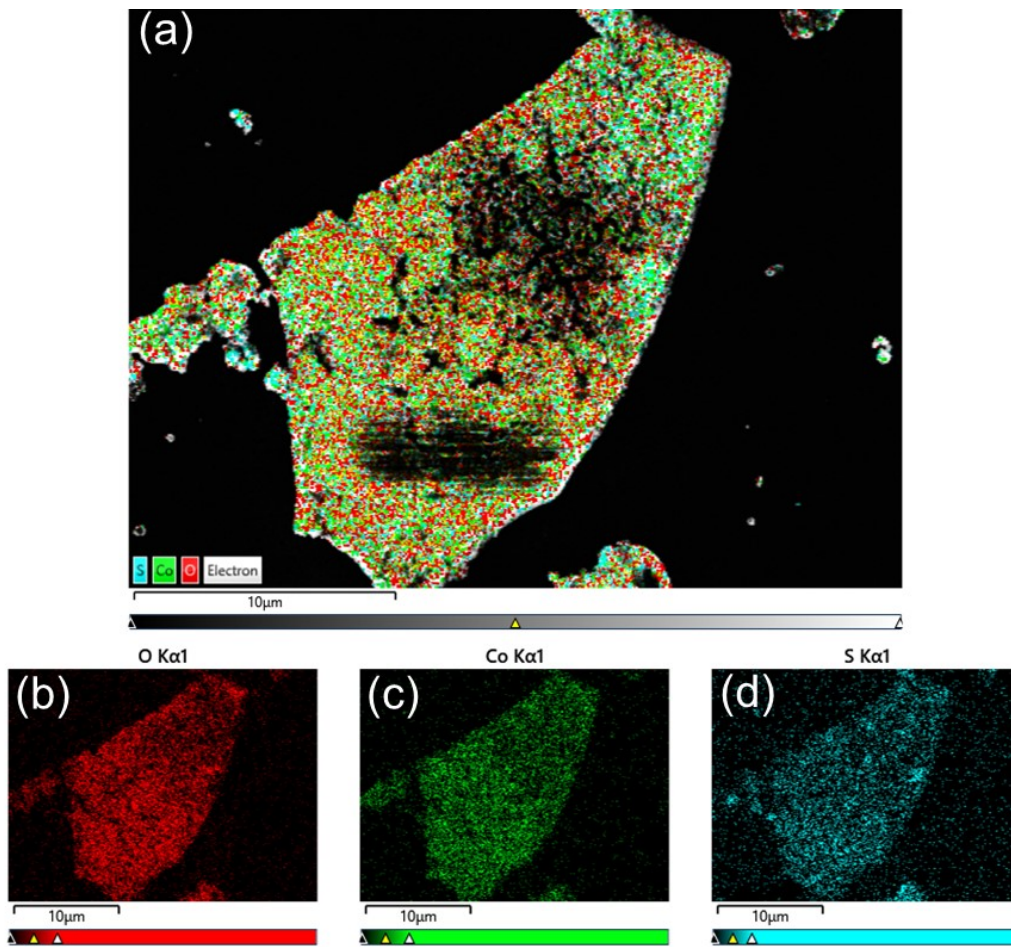

**Fig. S5** (a-d) SEM elemental mapping of  $\text{Co}_3\text{O}_4\text{-S}$ .

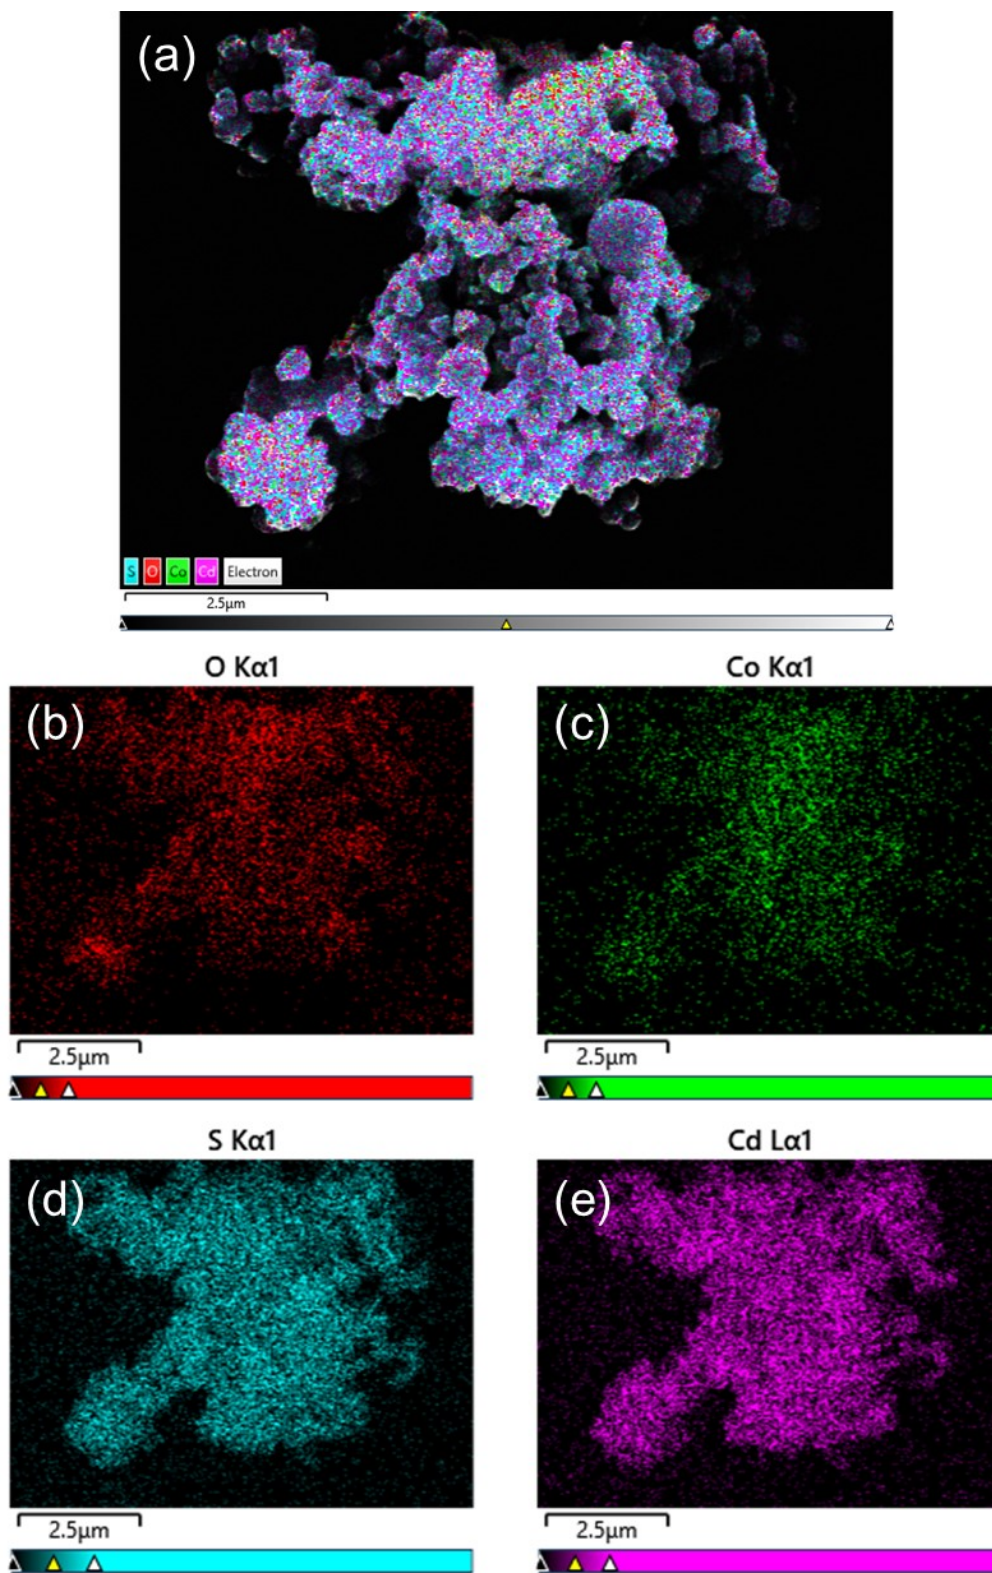

**Fig. S6** (a-e) SEM elemental mapping of  $\text{Co}_3\text{O}_4\text{-CdS-100}$ .

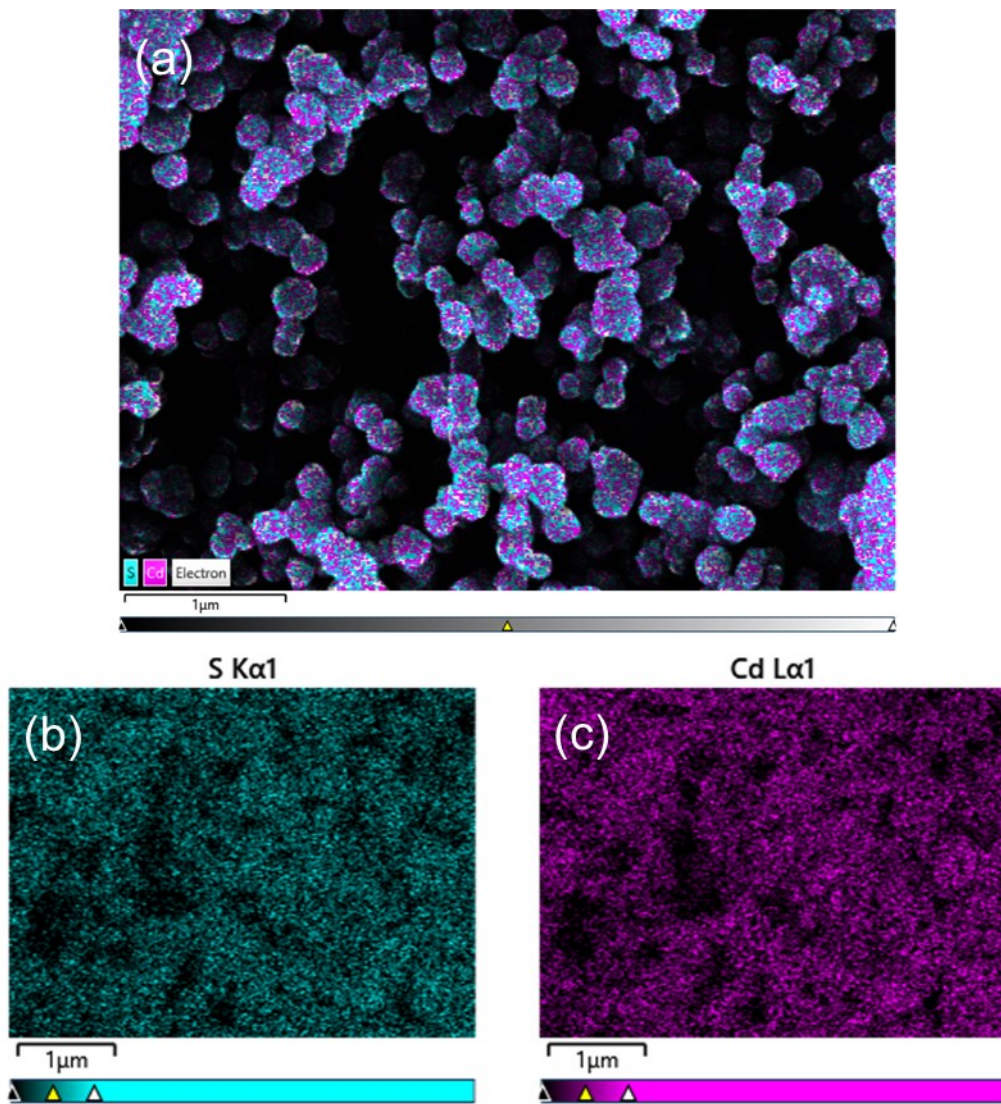

**Fig. S7** (a-c) SEM elemental mapping of CdS.

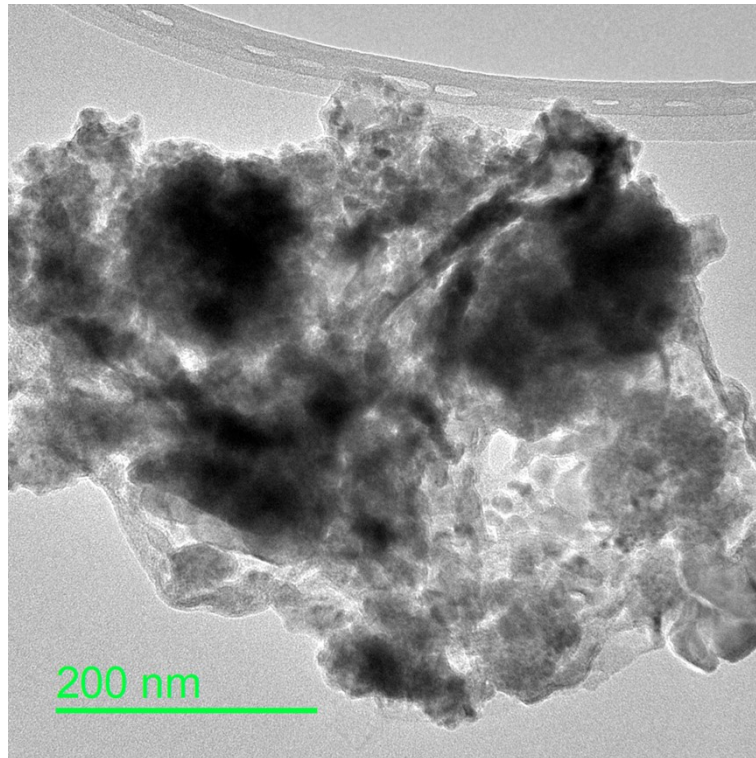

**Fig. S8** TEM images of Co<sub>3</sub>O<sub>4</sub>-CdS-100.



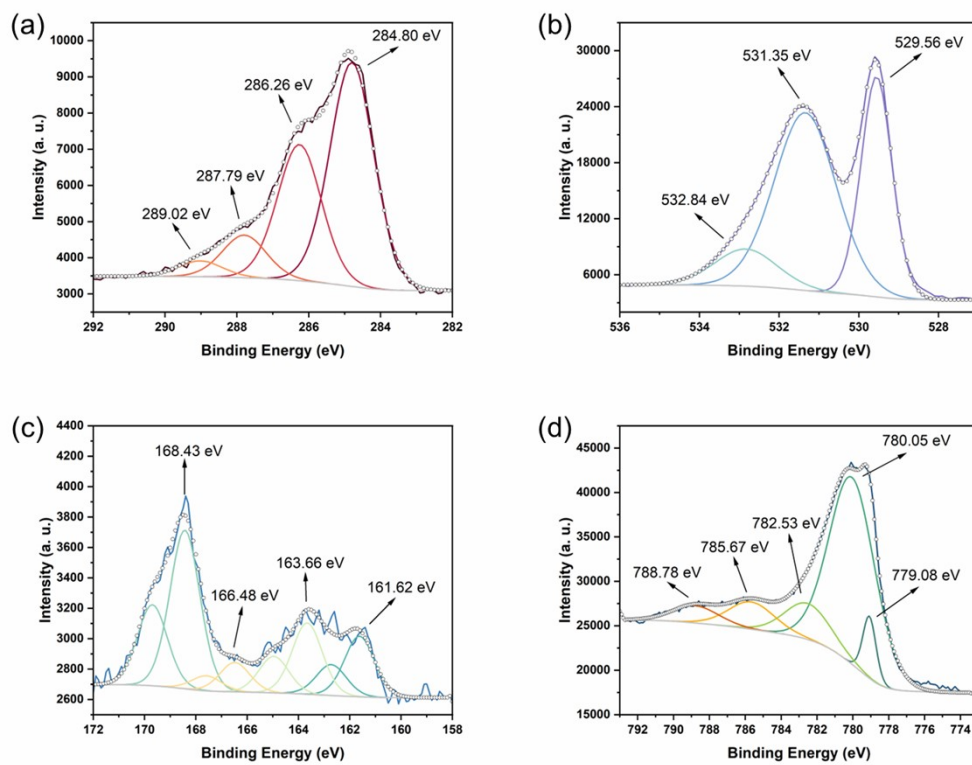

**Fig. S9** XPS spectra of (a) C 1s, (b) O 1s, (c) S 2p, and (d) Co 2p of  $\text{Co}_3\text{O}_4\text{-S}$ .

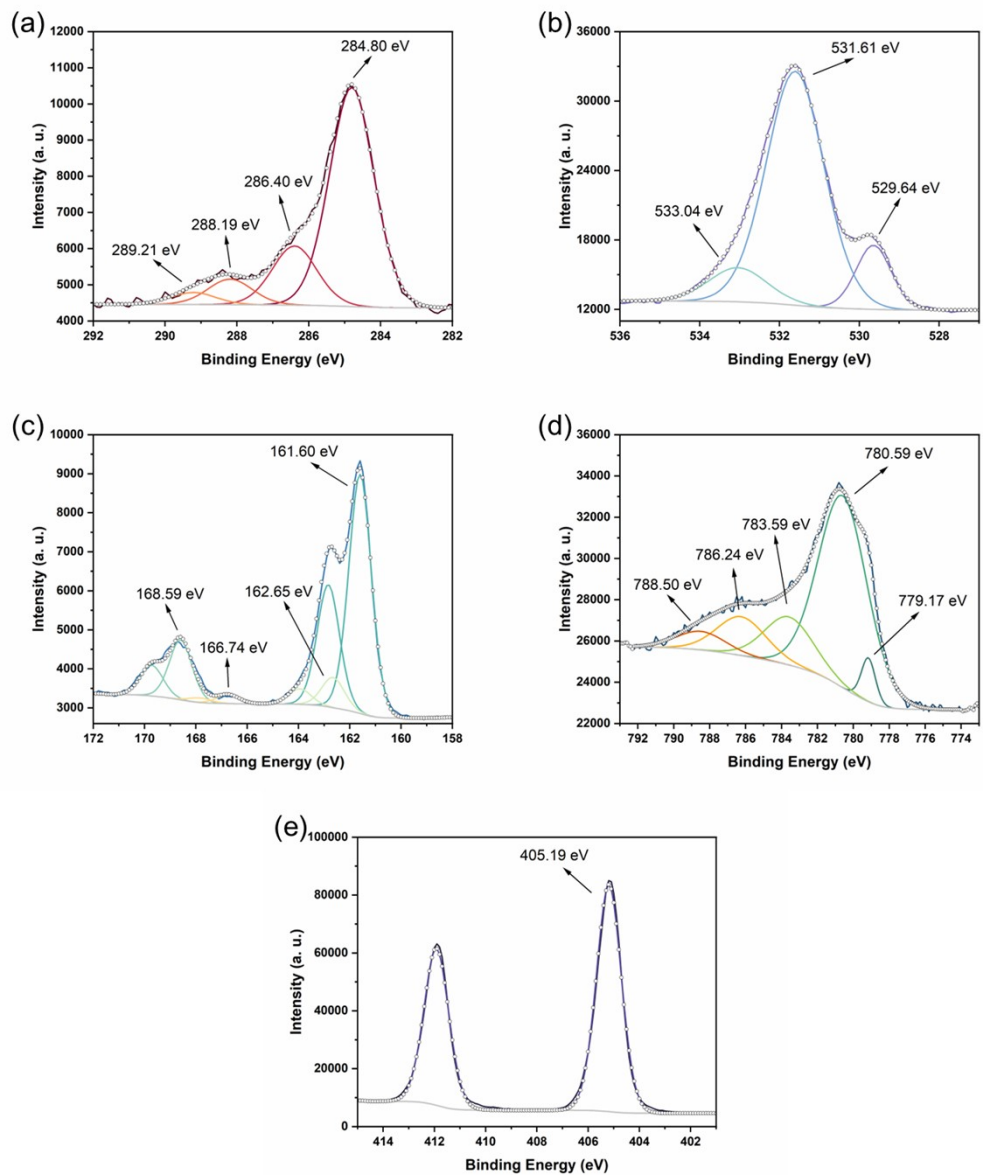

**Fig. S10** XPS spectra of (a) C 1s, (b) O 1s, (c) S 2p, (d) Co 2p, and (e) Cd 3d of Co<sub>3</sub>O<sub>4</sub>-CdS-100.

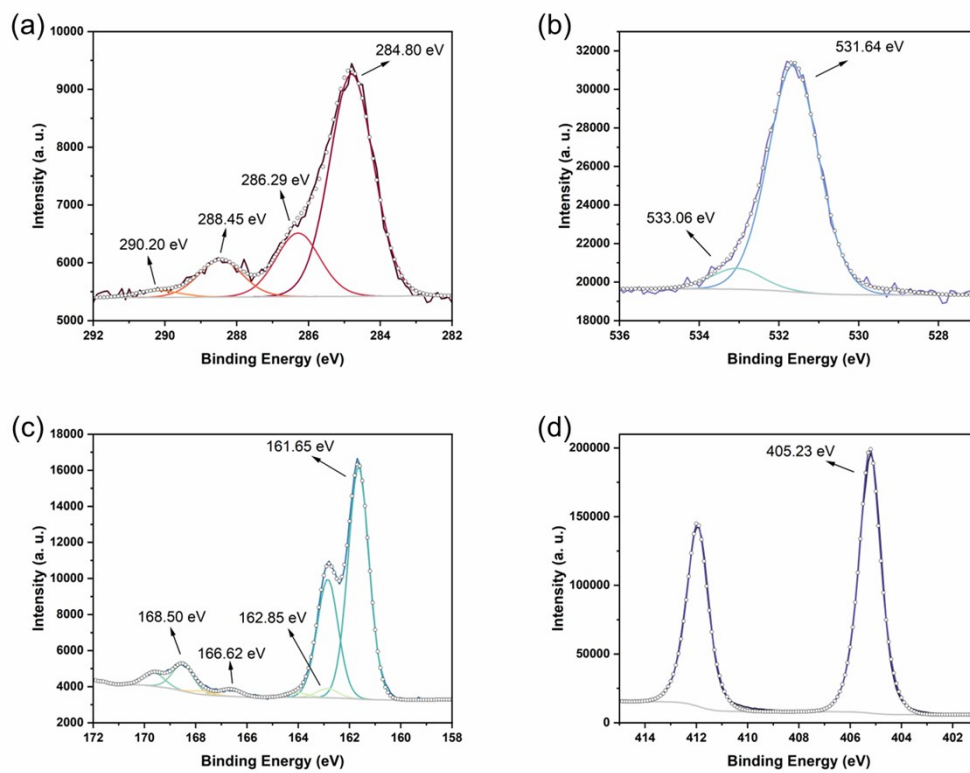

**Fig. S11** XPS spectra of (a) C 1s, (b) O 1s, (c) S 2p, (d) Cd 3d of CdS.

**Table S2.** Summary of syngas production rates of different catalysts in the presence of 0.4 M formate.

| <b>Catalyst</b>                         | <b>pH</b> | <b>H<sub>2</sub> (<math>\mu\text{mol g}^{-1} \text{h}^{-1}</math>)</b> | <b>CO (<math>\mu\text{mol g}^{-1} \text{h}^{-1}</math>)</b> |
|-----------------------------------------|-----------|------------------------------------------------------------------------|-------------------------------------------------------------|
| Co <sub>3</sub> O <sub>4</sub> -CdS-40  | 13        | 0                                                                      | 23.3                                                        |
| Co <sub>3</sub> O <sub>4</sub> -CdS-80  | 13        | 0                                                                      | 332.5                                                       |
| Co <sub>3</sub> O <sub>4</sub> -CdS-100 | 13        | 279.1                                                                  | 430.4                                                       |
| Co <sub>3</sub> O <sub>4</sub> -CdS-200 | 13        | 92.4                                                                   | 389.2                                                       |

**Table S3.** Summary of syngas production rates of Co<sub>3</sub>O<sub>4</sub>-CdS-100 in the presence of 0.4 M formate at different pH conditions.

| <b>Catalyst</b>                         | <b>pH</b> | <b>H<sub>2</sub> (μmol g<sup>-1</sup> h<sup>-1</sup>)</b> | <b>CO (μmol g<sup>-1</sup> h<sup>-1</sup>)</b> | <b>CO<sub>2</sub> (μmol g<sup>-1</sup> h<sup>-1</sup>)</b> |
|-----------------------------------------|-----------|-----------------------------------------------------------|------------------------------------------------|------------------------------------------------------------|
| Co <sub>3</sub> O <sub>4</sub> -CdS-100 | 4         | 9435.7                                                    | 76.8                                           | 8857.0                                                     |
| Co <sub>3</sub> O <sub>4</sub> -CdS-100 | 7         | 3101.1                                                    | 1300.2                                         | 37.4                                                       |
| Co <sub>3</sub> O <sub>4</sub> -CdS-100 | 10        | 1848.3                                                    | 1435.5                                         | 4.2                                                        |
| Co <sub>3</sub> O <sub>4</sub> -CdS-100 | 11        | 708.4                                                     | 779.9                                          | 2.5                                                        |
| Co <sub>3</sub> O <sub>4</sub> -CdS-100 | 12        | 274.1                                                     | 590.5                                          | 0.8                                                        |
| Co <sub>3</sub> O <sub>4</sub> -CdS-100 | 13        | 279.1                                                     | 430.4                                          | 0                                                          |

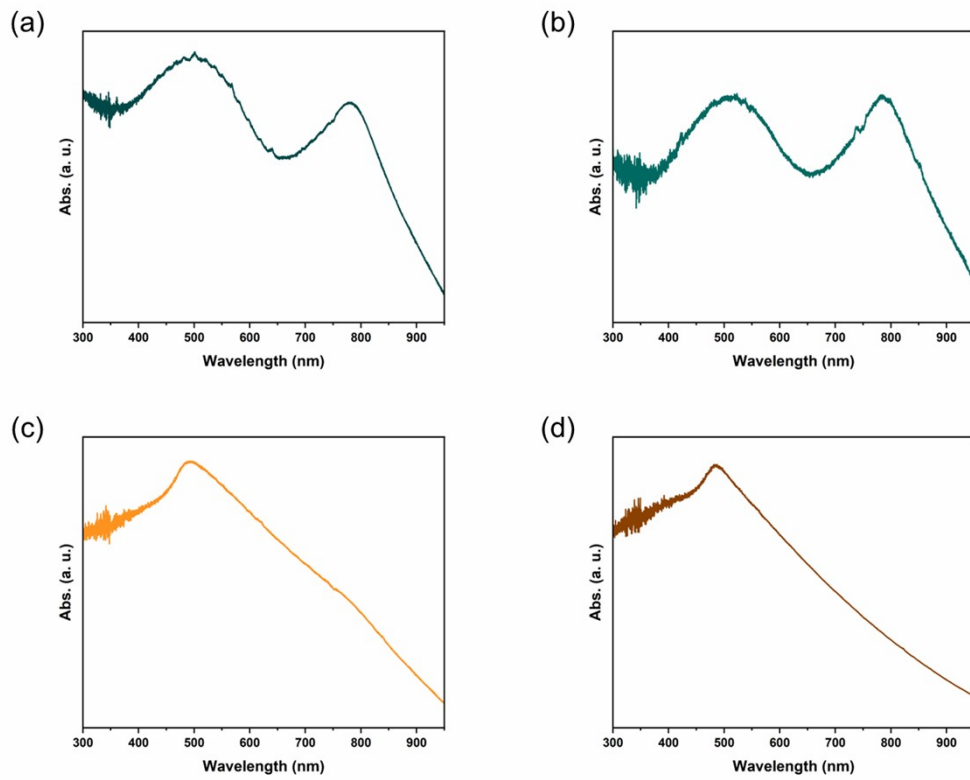

**Fig. S12** UV-vis spectra of (a)  $\text{Co}_3\text{O}_4$ , (b)  $\text{Co}_3\text{O}_4\text{-S}$ , (c)  $\text{Co}_3\text{O}_4\text{-CdS-100}$ , and (d) CdS.

**Table S4.** Summary of TRPL results.

| <b>Sample</b>                                       | <b>t1 (ns)</b> | <b>Error bar<br/>(±) ns</b> | <b>t2 (ns)</b> | <b>Error bar<br/>(±) ns</b> | <b>Average Lifetime<br/>(ns)</b> | <b>Error bar<br/>(±) ns</b> |
|-----------------------------------------------------|----------------|-----------------------------|----------------|-----------------------------|----------------------------------|-----------------------------|
| Co <sub>3</sub> O <sub>4</sub> -S (805 nm)          | 8.09           | 1.13                        | 37.23          | 2.65                        | 15.75                            | 2.89                        |
| Co <sub>3</sub> O <sub>4</sub> -CdS-100<br>(510 nm) | 11.28          | 0.39                        | 47.10          | 0.88                        | 18.85                            | 0.96                        |
| CdS (508 nm)                                        | 11.00          | 0.37                        | 46.33          | 0.88                        | 17.68                            | 0.95                        |

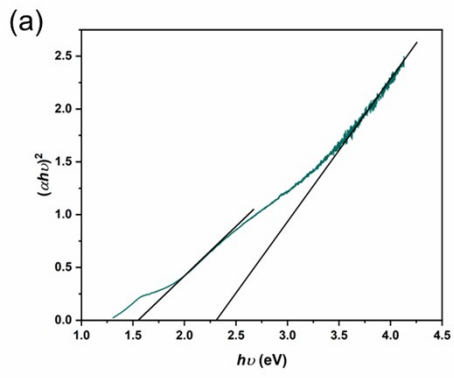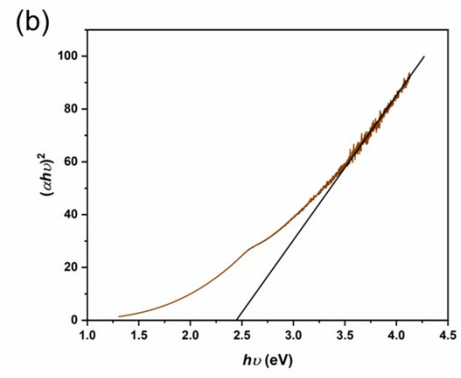

**Fig. S13** Tauc plots of (a)  $\text{Co}_3\text{O}_4\text{-S}$ , and (b) CdS.



## References

1. C. Zhao, A. Krall, H. Zhao, Q. Zhang and Y. Li, *International Journal of Hydrogen Energy*, 2012, **37**, 9967-9976.
2. S. Wang, W. Yao, J. Lin, Z. Ding and X. Wang, *Angewandte Chemie International Edition*, 2014, **53**, 1034-1038.
3. P. G. Alsabeh, A. Rosas-Hernández, E. Barsch, H. Junge, R. Ludwig and M. Beller, *Catalysis Science & Technology*, 2016, **6**, 3623-3630.
4. P. Akhter, M. Hussain, G. Saracco and N. Russo, *Fuel*, 2015, **149**, 55-65.
5. P. Reñones, A. Moya, F. Fresno, L. Collado, J. J. Vilatela and V. A. de la Peña O'Shea, *Journal of CO<sub>2</sub> Utilization*, 2016, **15**, 24-31.
6. J.-S. Lee, D.-I. Won, W.-J. Jung, H.-J. Son, C. Pac and S. O. Kang, *Angewandte Chemie International Edition*, 2017, **56**, 976-980.
7. D. Li, S. Ouyang, H. Xu, D. Lu, M. Zhao, X. Zhang and J. Ye, *Chemical Communications*, 2016, **52**, 5989-5992.
8. J. Zhao, Q. Wang, C. Sun, T. Zheng, L. Yan, M. Li, K. Shao, X. Wang and Z. Su, *Journal of Materials Chemistry A*, 2017, **5**, 12498-12505.
9. Y. n. Yao, Y. Gao, L. Ye, H. Chen and L. Sun, *Journal of Energy Chemistry*, 2018, **27**, 502-506.
10. Q. Mu, W. Zhu, G. Yan, Y. Lian, Y. Yao, Q. Li, Y. Tian, P. Zhang, Z. Deng and Y. Peng, *Journal of Materials Chemistry A*, 2018, **6**, 21110-21119.
11. A. Li, T. Wang, X. Chang, Z.-J. Zhao, C. Li, Z. Huang, P. Yang, G. Zhou and J. Gong, *Chemical Science*, 2018, **9**, 5334-5340.
12. X. Wang, Z. Wang, Y. Bai, L. Tan, Y. Xu, X. Hao, J. Wang, A. H. Mahadi, Y. Zhao, L. Zheng and Y.-F. Song, *Journal of Energy Chemistry*, 2020, **46**, 1-7.
13. M. Liu, Y.-F. Mu, S. Yao, S. Guo, X.-W. Guo, Z.-M. Zhang and T.-B. Lu, *Applied Catalysis B: Environmental*, 2019, **245**, 496-501.
14. W. Yao, C. Qin, N. Xu, J. Zhou, C. Sun, L. Liu and Z. Su, *CrystEngComm*, 2019, **21**, 6423-6431.
15. J.-C. Hu, M.-X. Gui, W. Xia, J. Wu, Y.-N. Zhou, N. Feng, J. Xiao, H. Liu, C.-H. Tung, L.-Z. Wu and F. Wang, *Journal of Materials Chemistry A*, 2019, **7**, 10475-10482.
16. P. Reñones, L. Collado, A. Iglesias-Juez, F. E. Oropeza, F. Fresno and V. A. de la Peña O'Shea, *Industrial & Engineering Chemistry Research*, 2020, **59**, 9440-9450.
17. R. M. Irfan, T. Wang, D. Jiang, Q. Yue, L. Zhang, H. Cao, Y. Pan and P. Du, *Angewandte Chemie International Edition*, 2020, **59**, 14818-14824.
18. M. Sun, C. Wang, C.-Y. Sun, M. Zhang, X.-L. Wang and Z.-M. Su, *Journal of Catalysis*, 2020, **385**, 70-75.
19. C. Qiu, X. Hao, L. Tan, X. Wang, W. Cao, J. Liu, Y. Zhao and Y.-F. Song, *Chemical Communications*, 2020, **56**, 5354-5357.
20. Z. Fu, X. Wang, A. M. Gardner, X. Wang, S. Y. Chong, G. Neri, A. J. Cowan, L. Liu, X. Li, A. Vogel, R. Clowes, M. Bilton, L. Chen, R. S. Sprick and A. I. Cooper, *Chemical Science*, 2020, **11**, 543-550.
21. B. Han, X. Ou, Z. Zhong, S. Liang, H. Deng and Z. Lin, *Small*, 2020, **16**, 2002985.
22. H. Yang, D. Yang and X. Wang, *Angewandte Chemie International Edition*, 2020, **59**, 15527-15531.
23. H. Xu, S. You, Z. Lang, Y. Sun, C. Sun, J. Zhou, X. Wang, Z. Kang and Z. Su, *Chemistry – A European Journal*, 2020, **26**, 2735-2740.
24. X. Zhao, J. Zhou, C.-Y. Sun, S.-Q. You, X.-L. Wang and Z.-M. Su, *Nanotechnology*, 2020, **31**, 255402.
25. J. Yang, Z. Wang, J. Jiang, W. Chen, F. Liao, X. Ge, X. Zhou, M. Chen, R. Li, Z. Xue, G. Wang, X. Duan, G. Zhang, Y.-G. Wang and Y. Wu, *Nano Energy*, 2020, **76**, 105059.
26. Z. Wang, J. Yang, J. Cao, W. Chen, G. Wang, F. Liao, X. Zhou, F. Zhou, R. Li, Z.-Q. Yu, G. Zhang, X. Duan and Y. Wu, *ACS Nano*, 2020, **14**, 6164-6172.
27. H. Huo, D. Liu, H. Feng, Z. Tian, X. Liu and A. Li, *Nanoscale*, 2020, **12**, 13912-13917.

28. L. Tan, K. Peter, J. Ren, B. Du, X. Hao, Y. Zhao and Y.-F. Song, *Frontiers of Chemical Science and Engineering*, 2021, **15**, 99-108.
29. B. Han, X. Ou, Z. Zhong, S. Liang, X. Yan, H. Deng and Z. Lin, *Applied Catalysis B: Environmental*, 2021, **283**, 119594.
30. Y. He, X. Chen, C. Huang, L. Li, C. Yang and Y. Yu, *Chinese Journal of Catalysis*, 2021, **42**, 123-130.
31. P. Yang, L. Shang, J. Zhao, M. Zhang, H. Shi, H. Zhang and H. Yang, *Applied Catalysis B: Environmental*, 2021, **297**, 120496.
32. X. Yao, K. Chen, L.-Q. Qiu, Z.-W. Yang and L.-N. He, *Chemistry of Materials*, 2021, **33**, 8863-8872.
33. C. Chen, J. Hu, X. Yang, T. Yang, J. Qu, C. Guo and C. M. Li, *ACS Applied Materials & Interfaces*, 2021, **13**, 20162-20173.
34. L. Zhang, Y. Yang, J. Tian, J. Li, G. Chen, L. Zhou, Y. Sun and Y. Qiu, *ChemSusChem*, 2022, **15**, e202102729.
35. T. Tian, X. Jin, N. Guo, H. Li, Y. Han and Y. Yuan, *Applied Catalysis B: Environmental*, 2022, **308**, 121227.
36. K. Li, Y. Cai, X. Yang, S. Wang, C. Teng, Y. Tian, Q. Min and W. Zhu, *Advanced Functional Materials*, 2022, **32**, 2113002.
37. P. M. Stanley, A. Y. Su, V. Ramm, P. Fink, C. Kimna, O. Lieleg, M. Elsner, J. A. Lercher, B. Rieger, J. Warnan and R. A. Fischer, *Advanced Materials*, 2023, **35**, 2207380.
38. R. Muhammad Irfan, M. K. Zaman, M. H. Tahir, A. Ahmad, M. Tayyab, T. Ahmad, M. Hussain, I. Arshad and M. A. Shaheen, *ACS Applied Energy Materials*, 2023, **6**, 1834-1844.
39. T. Wang, M. Chen, J. Wu and P. Du, *Journal of Materials Chemistry A*, 2023, **11**, 2246-2251.
40. K.-Q. Lu, J.-G. Hao, Y. Wei, B. Weng, S. Ge, K. Yang, S. Lu, M.-Q. Yang and Y. Liao, *Inorganic Chemistry*, 2024, **63**, 795-802.
41. D. Zhou, X. Xue, Q. Luan, L. Zhang, B. Li, X. Wang, W. Dong, G. Wang and C. Hou, *Chinese Chemical Letters*, 2023, **34**, 107798.
42. M. Lin, W. Jiang, T. Zhang, B. Yang, Z. Zhuang and Y. Yu, *Small Science*, 2023, **3**, 2200085.
43. X. Ye, Y. Dong, Z. Zhang, W. Zeng, B. Zhu, T. Zhang, Z. Gao, A. Dai and X. Guan, *Frontiers in Energy*, 2024, DOI: 10.1007/s11708-024-0940-x.
